# Supplementary material
Source: HighWire-hosted journal article supplement (https://bmjopen.bmj.com/content/9/12/e030984)
Supplement: inline-supplementary-material-1 [file inline-supplementary-material-1.pdf]

**Supplementary Appendix****Table S1: MeSH terms for the Ovid (MEDLINE) search strategy.**

| Search term                                                                                                                                                                               | Results |
|-------------------------------------------------------------------------------------------------------------------------------------------------------------------------------------------|---------|
| 1 (exp Registries/ or Datasets as Topic/ or exp Management Information Systems/ or hospital records/ or exp medical records/ or nursing records/) and exp Quality Assurance, Health Care/ | 16541   |
| 2 (("Clinical" or "Clinical quality") adj ("Registry" or "Registries" or "register" or "registers")).mp.                                                                                  | 938     |
| 3 (("Clinical" or "Clinical quality") adj ("data base" or database*)).mp.                                                                                                                 | 2635    |
| 4 (("Clinical" or "Clinical quality") adj5 ("medical record*" or "patient record*" or "health record*")).mp.                                                                              | 4188    |
| 5 exp "costs and cost analysis"/ or exp economics, hospital/ or exp economics, medical/ or economics, nursing/ or economics, pharmaceutical/                                              | 240706  |
| 6 exp Resource Allocation/                                                                                                                                                                | 16404   |
| 7 exp Health Services Research/ec, mt, sn, td, ut [Economics, Methods, Statistics & Numerical Data, Trends, Utilization]                                                                  | 23288   |
| 8 exp Evaluation Studies as Topic/cl, ec, mt, st, td [Classification, Economics, Methods, Standards, Trends]                                                                              | 38495   |
| 9 Program Evaluation/                                                                                                                                                                     | 56767   |
| 10 Economic evalu*.mp.                                                                                                                                                                    | 10449   |
| 11 Cost-benef*.mp.                                                                                                                                                                        | 79465   |
| 12 Cost-eff*.mp.                                                                                                                                                                          | 121231  |
| 13 cost-util*.mp.                                                                                                                                                                         | 4165    |
| 14 Medica* expend*.mp.                                                                                                                                                                    | 3733    |
| 15 Medica* cost*.mp.                                                                                                                                                                      | 10127   |
| 16 Health* expend*.mp.                                                                                                                                                                    | 20335   |

| Search term                                                                                                                                                              | Results |
|--------------------------------------------------------------------------------------------------------------------------------------------------------------------------|---------|
| 17 Health* cost*.mp.                                                                                                                                                     | 12307   |
| 18 ("direct service costs" or "drug costs" or "hospital costs" or "health expenditures").mp.                                                                             | 47234   |
| 19 (cost or costs or expend* or finance* or economic*).mp.                                                                                                               | 981580  |
| 20 or/1-4                                                                                                                                                                | 23961   |
| 21 or/5-19                                                                                                                                                               | 1084097 |
| 22 20 and 21                                                                                                                                                             | 3450    |
| 23 (randomized controlled trial or controlled clinical trial).pt.                                                                                                        | 551183  |
| 24 case-control studies/ or retrospective studies/ or cohort studies/ or longitudinal studies/ or follow-up studies/ or prospective studies/ or cross-sectional studies/ | 2152209 |
| 25 meta analysis/ or "review"/ or systematic reviews/                                                                                                                    | 2434008 |
| 26 exp animals/ not humans.sh.                                                                                                                                           | 4470062 |
| 27 23 or 24 or 25                                                                                                                                                        | 4929042 |
| 28 22 and 27                                                                                                                                                             | 894     |
| 29 28 not 26                                                                                                                                                             | 888     |
| 30 limit 29 to (english language and yr="2000 -Current")                                                                                                                 | 709     |

**Table S2: Quality appraisal of the three studies using CHEERS guidelines.**

| Item               |                                                        | Score<br>(1 = Yes; 0.5 = partial; 0 = No) |                 |                   |                      |
|--------------------|--------------------------------------------------------|-------------------------------------------|-----------------|-------------------|----------------------|
|                    |                                                        | Hollenbeak<br>(2011)                      | Thanh<br>(2018) | Woolley<br>(2006) | Overall<br>score (%) |
| Title and abstract |                                                        |                                           |                 |                   |                      |
| 1                  | Title                                                  | 1                                         | 1               | 1                 | 100%                 |
| 2                  | Abstract                                               | 1                                         | 1               | 1                 | 100%                 |
| Introduction       |                                                        |                                           |                 |                   |                      |
| 3                  | Background and objectives                              | 1                                         | 1               | 1                 | 100%                 |
| Methods            |                                                        |                                           |                 |                   |                      |
| 4                  | Target population, subgroups                           | 1                                         | 1               | 1                 | 100%                 |
| 5                  | Setting and location                                   | 1                                         | 1               | 1                 | 100%                 |
| 6                  | Study perspective                                      | 1                                         | 1               | 1                 | 100%                 |
| 7                  | Comparators                                            | 1                                         | 1               | 1                 | 100%                 |
| 8                  | Time horizon                                           | 1                                         | 1               | 1                 | 100%                 |
| 9                  | Discount rate                                          | 0                                         | 0               | 1                 | 33%                  |
| 10                 | Health outcomes                                        | 1                                         | 1               | 1                 | 100%                 |
| 11                 | Measurement of effectiveness                           | 1                                         | 1               | 1                 | 100%                 |
| 12                 | Measurement and valuation of preference-based outcomes | N/A                                       | N/A             | N/A               | N/A                  |
| 13                 | Estimating resources and costs                         | 1                                         | 1               | 1                 | 100%                 |
| 14                 | Currency, price date, conversion                       | 1                                         | 1               | 1                 | 100%                 |
| 15                 | Choice of model                                        | 0                                         | 0.5             | 0.5               | 33%                  |
| 16                 | Assumptions                                            | 1                                         | 1               | 1                 | 100%                 |
| 17                 | Analytical methods                                     | 1                                         | 1               | 0.5               | 83%                  |
| Results            |                                                        |                                           |                 |                   |                      |
| 18                 | Study parameters                                       | 1                                         | 1               | 1                 | 100%                 |

|                               |                                               |     |     |     |      |
|-------------------------------|-----------------------------------------------|-----|-----|-----|------|
| 19                            | Incremental costs and outcomes                | 1   | 1   | 1   | 100% |
| 20                            | Characterising uncertainty                    | 1   | 1   | 1   | 100% |
| 21                            | Characterising heterogeneity                  | 0   | 1   | 0   | 33%  |
| Discussion                    |                                               |     |     |     |      |
| 22                            | Study findings, limitations, generalizability | 1   | 1   | 0.5 | 83%  |
| Other                         |                                               |     |     |     |      |
| 23                            | Source of funding                             | 0   | 1   | 1   | 67%  |
| 24                            | Conflicts of interest                         | 1   | 1   | 0   | 33%  |
| Quality score (n = 3)         |                                               | 83% | 93% | 85% | -    |
| Average quality score (n = 3) |                                               | 87% |     |     |      |

N/A = not applicable

**Table S3: Quality appraisal of the ACSQHC report using AACODS guidelines.**

| Item         |                                                                           | Score<br>(Yes = 1; Unclear = 0.5; No = 0) |
|--------------|---------------------------------------------------------------------------|-------------------------------------------|
| Authority    |                                                                           |                                           |
| 1.1          | Does the report identify who is responsible for the intellectual content? | 1                                         |
| 1.2          | Are they reputable?                                                       | 1                                         |
| Accuracy     |                                                                           |                                           |
| 2.1          | Does the item have a clearly stated aim or brief?                         | 1                                         |
| 2.2          | Does it have a stated methodology?                                        | 1                                         |
| 2.3          | Has it been peer-reviewed?                                                | 1                                         |
| 2.4          | Has it been edited by a reputable authority?                              | 1                                         |
| Coverage     |                                                                           |                                           |
| 3.1          | Are any limits clearly stated?                                            | 1                                         |
| Objectivity  |                                                                           |                                           |
| 4.1          | Is the author's standpoint clear?                                         | 1                                         |
| 4.2          | Does the work seem to be balanced in presentation?                        | 1                                         |
| Date         |                                                                           |                                           |
| 5.1          | Does the item have a clearly stated date related to content?              | 1                                         |
| Significance |                                                                           |                                           |
| 6.1          | Is the item meaningful?                                                   | 1                                         |
| 6.2          | Does it add context?                                                      | 1                                         |
| 6.3          | Does it strengthen or refute a current position?                          | 1                                         |
| 6.4          | Would the research area be lesser without it?                             | 1                                         |

**Table S4: Quality appraisal of the three studies using the CHEC-extended checklist.**

| Question                                                                                    | Score (1 = Yes; 0.5 = partial; 0 = No) |                 |                   |                      |
|---------------------------------------------------------------------------------------------|----------------------------------------|-----------------|-------------------|----------------------|
|                                                                                             | Hollenbeak<br>(2011)                   | Thanh<br>(2018) | Woolley<br>(2006) | Overall<br>score (%) |
| Is the study population clearly described?                                                  | 1                                      | 1               | 1                 | 100%                 |
| Are competing alternatives clearly described?                                               | 0                                      | 0               | 1                 | 33%                  |
| Is a well-defined research question posed in answerable form?                               | 1                                      | 1               | 1                 | 100%                 |
| Is the economic study design appropriate to the stated objective?                           | 1                                      | 1               | 1                 | 100%                 |
| Are the structural assumptions and the validation methods of the model properly reported?   | 1                                      | 1               | 0.5               | 83%                  |
| Is the chosen time horizon appropriate in order to include relevant costs and consequences? | 1                                      | 1               | 1                 | 100%                 |
| Is the actual perspective chosen appropriate?                                               | 1                                      | 1               | 1                 | 100%                 |
| Are all important and relevant costs for each alternative identified?                       | 1                                      | 1               | 1                 | 100%                 |
| Are all costs measured appropriately in physical units?                                     | 1                                      | 1               | 1                 | 100%                 |
| Are costs valued appropriately?                                                             | 1                                      | 1               | 1                 | 100%                 |
| Are all important and relevant outcomes for each alternative identified?                    | 1                                      | 1               | 1                 | 100%                 |
| Are all outcomes measured appropriately?                                                    | 1                                      | 1               | 0.5               | 83%                  |
| Are outcomes valued appropriately?                                                          | 1                                      | 1               | 1                 | 100%                 |
| Is an appropriate incremental analysis of costs and outcomes of alternatives performed?     | 1                                      | 1               | 1                 | 100%                 |
| Are all future costs and outcomes discounted appropriately?                                 | 0                                      | 0               | 1                 | 33%                  |

|                                                                                                                        |     |     |     |      |
|------------------------------------------------------------------------------------------------------------------------|-----|-----|-----|------|
| Are all important variables, whose values are uncertain, appropriately subjected to sensitivity analysis?              | 1   | 1   | 1   | 100% |
| Do the conclusions follow from the data reported?                                                                      | 1   | 1   | 0.5 | 83%  |
| Does the study discuss the generalizability of the results to other settings and patient/client groups?                | 1   | 1   | 0.5 | 83%  |
| Does the article/report indicate that there is no potential conflict of interest of study researcher(s) and funder(s)? | 1   | 1   | 0   | 67%  |
| Are ethical and distributional issues discussed appropriately?                                                         | 0   | 0   | 0   | 0    |
| % Yes                                                                                                                  | 17  | 17  | 16  | -    |
| Overall Quality                                                                                                        | 85% | 85% | 80% | 83%  |
